# Supplementary material
Source: PubMed Central journal article supplement (PMC11558793)
Supplement: NIHMS2033068-supplement-supplementary_material.pdf [file NIHMS2033068-supplement-supplementary_material.pdf]

---

# *Helicobacter pylori* infection

---

In the format provided by the  
authors and unedited

## Supplementary Table 1 | Ongoing trials with potassium-competitive acid blockers (P-CABs)

| Drug                | Identifier                                                                                                                                                                                      | Title                                                                                                                                                                                                          | Status             | Sponsor                                         | Phase | Industry | Design         | Start     |
|---------------------|-------------------------------------------------------------------------------------------------------------------------------------------------------------------------------------------------|----------------------------------------------------------------------------------------------------------------------------------------------------------------------------------------------------------------|--------------------|-------------------------------------------------|-------|----------|----------------|-----------|
| <b>Industry</b>     |                                                                                                                                                                                                 |                                                                                                                                                                                                                |                    |                                                 |       |          |                |           |
| vonoprazan          | <b>NCT05073367</b><br>US National Library of Medicine, ClinicalTrials.gov, <a href="https://clinicaltrials.gov/ct2/show/NCT05073367">https://clinicaltrials.gov/ct2/show/NCT05073367</a> (2022) | A Study Reviewing Medical Records of Adults With <i>Helicobacter pylori</i> Infections in China                                                                                                                | Not yet recruiting | Takeda                                          | ...   | Industry | Observational  | 31-Aug-22 |
| tegoprazan          | <b>K-CAB-006, KCT0005202</b><br>Adis Insight, Springer.com, <a href="https://adisinsight.springer.com/trials/700325915">https://adisinsight.springer.com/trials/700325915</a> (2020)            | K-CAB (Tegoprazan) based 10 days Concomitant therapy for Eradication of <i>Helicobacter pylori</i> Infections                                                                                                  | Recruiting         | Hk Inno.N                                       | 2     | Industry | Prospective    | Sep-20    |
| <b>Non-Industry</b> |                                                                                                                                                                                                 |                                                                                                                                                                                                                |                    |                                                 |       |          |                |           |
| vonoprazan          | <b>NCT03908619</b><br>US National Library of Medicine, ClinicalTrials.gov, <a href="https://clinicaltrials.gov/ct2/show/NCT03908619">https://clinicaltrials.gov/ct2/show/NCT03908619</a> (2020) | A RCT of Triple Therapy With Proton Pump Inhibitor vs Vonoprazan for <i>Helicobacter pylori</i> Gastritis                                                                                                      | Recruiting         | Changi General Hospital                         | 4     | Other    | Interventional | 16-Apr-19 |
| vonoprazan          | <b>NCT05189444</b><br>US National Library of Medicine, ClinicalTrials.gov, <a href="https://clinicaltrials.gov/ct2/show/NCT05189444">https://clinicaltrials.gov/ct2/show/NCT05189444</a> (2022) | The Evaluation of Triple Therapy With Vonoprazan, Amoxicillin and Bismuth for Eradication of <i>Helicobacter pylori</i>                                                                                        | Not yet recruiting | Huazhong University of Science and Technology   | ...   | Other    | Interventional | 25-Mar-22 |
| vonoprazan          | <b>NCT05191888</b><br>US National Library of Medicine, ClinicalTrials.gov, <a href="https://clinicaltrials.gov/ct2/show/NCT05191888">https://clinicaltrials.gov/ct2/show/NCT05191888</a> (2022) | 14-day PCAB-based High-dose Dual Therapy and 14-day PCAB-based Triple Therapy vs 14-day PPI-based Reverse Hybrid Therapy                                                                                       | Recruiting         | Kaohsiung Medical University                    | 4     | Other    | Interventional | 6-Aug-21  |
| vonoprazan          | <b>NCT04713670</b><br>US National Library of Medicine, ClinicalTrials.gov, <a href="https://clinicaltrials.gov/ct2/show/NCT04713670">https://clinicaltrials.gov/ct2/show/NCT04713670</a> (2021) | Comparison of Vonoprazan-based Versus Lansoprazole-based Triple Therapy, High Dose Dual Therapy, Bismuth and Non-bismuth Quadruple Therapy in the First-line Treatment of <i>Helicobacter pylori</i> Infection | Not yet recruiting | National Taiwan University Hospital             | 4     | Other    | Interventional | Jan-21    |
| vonoprazan          | <b>NCT04907747</b><br>US National Library of Medicine, ClinicalTrials.gov, <a href="https://clinicaltrials.gov/ct2/show/NCT04907747">https://clinicaltrials.gov/ct2/show/NCT04907747</a>        | Efficacy and Safety of Vonoprazan as First-line Treatment for <i>Helicobacter pylori</i> Eradication                                                                                                           | Recruiting         | Second Affiliated Hospital, School of Medicine, | 4     | Other    | Interventional | 18-May-21 |

|            |                                                                                                                                                                                                 |                                                                                                                                |                    |                                 |     |       |                |           |
|------------|-------------------------------------------------------------------------------------------------------------------------------------------------------------------------------------------------|--------------------------------------------------------------------------------------------------------------------------------|--------------------|---------------------------------|-----|-------|----------------|-----------|
|            | ov/ct2/show/NCT04907747 (2021)                                                                                                                                                                  |                                                                                                                                |                    | Zhejiang University             |     |       |                |           |
| vonoprazan | <b>NCT04991584</b><br>US National Library of Medicine, ClinicalTrials.gov, <a href="https://clinicaltrials.gov/ct2/show/NCT04991584">https://clinicaltrials.gov/ct2/show/NCT04991584</a> (2021) | Efficacy and Safety of 14-day Concomitant Therapy for <i>Helicobacter pylori</i> Infection                                     | Not yet recruiting | Shandong University             | ... | Other | Interventional | 4-Aug-21  |
| vonoprazan | <b>NCT05133193</b><br>US National Library of Medicine, ClinicalTrials.gov, <a href="https://clinicaltrials.gov/ct2/show/NCT05133193">https://clinicaltrials.gov/ct2/show/NCT05133193</a> (2021) | Efficacy and Safety of 14-day Concomitant Therapy for Refractory <i>Helicobacter pylori</i> Infection                          | Not yet recruiting | Shandong University             | ... | Other | Interventional | 20-Nov-21 |
| vonoprazan | <b>NCT04850209</b><br>US National Library of Medicine, ClinicalTrials.gov, <a href="https://clinicaltrials.gov/ct2/show/NCT04850209">https://clinicaltrials.gov/ct2/show/NCT04850209</a> (2021) | The Impact of WeChat Group Patient Education on the Eradication Rate of <i>Helicobacter pylori</i>                             | Recruiting         | Shandong University             | ... | Other | Interventional | 23-Jul-21 |
| vonoprazan | <b>NCT05129176</b><br>US National Library of Medicine, ClinicalTrials.gov, <a href="https://clinicaltrials.gov/ct2/show/NCT05129176">https://clinicaltrials.gov/ct2/show/NCT05129176</a> (2021) | <i>Helicobacter pylori</i> First-line Treatment Containing Tetracycline in Patients Allergic to Penicillin                     | Recruiting         | Shandong University             | 4   | Other | Interventional | 23-Nov-21 |
| vonoprazan | <b>NCT05135182</b><br>US National Library of Medicine, ClinicalTrials.gov, <a href="https://clinicaltrials.gov/ct2/show/NCT05135182">https://clinicaltrials.gov/ct2/show/NCT05135182</a> (2021) | <i>Helicobacter pylori</i> Rescue Treatment in Patients Allergic to Penicillin                                                 | Recruiting         | Shandong University             | 4   | Other | Interventional | 28-Nov-21 |
| vonoprazan | <b>NCT05049902</b><br>US National Library of Medicine, ClinicalTrials.gov, <a href="https://clinicaltrials.gov/ct2/show/NCT05049902">https://clinicaltrials.gov/ct2/show/NCT05049902</a> (2022) | Bismuth-containing Quadruple Therapy for <i>Helicobacter pylori</i> Eradication                                                | Recruiting         | Shandong University             | 4   | Other | Interventional | 21-Sep-21 |
| vonoprazan | NCT04901117<br>US National Library of Medicine, ClinicalTrials.gov, <a href="https://clinicaltrials.gov/ct2/show/NCT04901117">https://clinicaltrials.gov/ct2/show/NCT04901117</a> (2021)        | Bismuth-containing Quadruple Therapy for <i>Helicobacter pylori</i> Eradication: A Randomized Clinical Trial of 10 and 14 Days | Not yet recruiting | Shandong University and others* | 4   | Other | Interventional | Jun-21    |

Studies of the role of P-CABS in the eradication of H. pylori as of 28 July 2022. \*Shandong University, The Affiliated Hospital of Qingdao University, The People's Hospital of Guangrao, Weihai Municipal Hospital, Shandong Provincial Third Hospital, Taian City Central Hospital, Jining No.2 People's Hospital, Maternity and Child Care Health Center of Dezhou Zoucheng People's Hospital, Heze Municipal 3rd people's hospital, Yuncheng Chengxin Hospital, PKUcare luzhong hospital, Qihe County City Hospital, Weifang People's Hospital, Qilu Hospital of Shandong University, Shandong Electric Power Central Hospital.
